# Supplementary material for: Built Environments to Support Rehabilitation for People With Stroke From the Hospital to the Home (B-Sure): Protocol for a Mixed Method Participatory Co-Design Study
Source: PubMed Central journal article supplement (PMC10667985; doi:10.2196/52489), 2023-11-09
Supplement: resprot_v12i1e52489_app1.pdf [file resprot_v12i1e52489_app1.pdf]

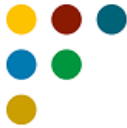

2021-01455

Marie Elf

Beredningsgrupp: Brg2108

**Utlysningsnamn:** Årliga öppna utlysningen 2021**Bidragsform:** Forskningsprojekt**Projekttitel (svenska):** Bygga miljöer för att stödja rehabilitering för patienter med stroke - Från sjukhuset till hemmet (B Sure)**Sökt inriktning:** Forskarinitierad**Vetenskaplig frågeställning****6***1 - Insufficient, 2 - Poor, 3 - Acceptable, 4 - Good, 5 - Very Good, 6 - Excellent, 7 - Outstanding***Metod och genomförande****5***1 - Insufficient, 2 - Poor, 3 - Acceptable, 4 - Good, 5 - Very Good, 6 - Excellent, 7 - Outstanding***Vetenskaplig kompetens****6***1 - Insufficient, 2 - Poor, 3 - Acceptable, 4 - Good, 5 - Very Good, 6 - Excellent, 7 - Outstanding***Frågeställningens samhällsnytta och****6****kommunikation av resultat***1 - Insufficient, 2 - Poor, 3 - Acceptable, 4 - Good, 5 - Very Good, 6 - Excellent, 7 - Outstanding***Slutbedömning (max 1 000 tecken inklusive****6****mellanslag)***1 - Insufficient application, 2 - Poor application, 3 - Acceptable application, 4 - Good application, 5 - Very good application, 6 - Excellent application, 7 - Outstanding application*

This is a novel, scientifically and societally important and novel project analyzing the potential and requirements of built environments to support the rehabilitation of patients suffering from a stroke. The research plan is excellently thought out and laid out, with many details about the overall research design, data to be collected in partnership with different stakeholders and using Living Labs, as well as appropriate data analysis. However, the proposed research requires ethical considerations. Overall, is particularly relevant to include a mixed-method design, including participatory co-design and prototype-testing and strong stakeholder participation. The societal contributions of the project are extensive, both from the point of view of creating healthier and more livable urban environments and also of improving care for socially and healthy vulnerable residents. Last, the overall group has extensive fundraising, supervision, and publication experience, especially so in the context of stroke recovery.
